# Supplementary material
Source: publisher site journal article supplement (https://thieme-connect.com/media/10.1055-s-00035037/201604/supmat/10-3414-me15-01-0143-supp.pdf)
Supplement: Supplementary file 1 [file 10-3414-me15-01-0143-supp.pdf]

## Appendix 1: Screen shots of the PEDro simple and advanced search pages for two search commands.

---

### Simple search

*Search command*

/search-results?calc\_text=low+back+pain&-find=Search

*Screen shot of search page*

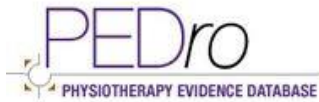

[Home](#) [New Search \(Simple\)](#) [New Search \(Advanced\)](#) [Search Help](#)

### Simple Search

---

Search term (or terms):

---

---

## Advanced search

### Search command

/advanced-search/results?abstract\_with\_title=carpal+tunnel+syndrome&therapy=VL01376&problem=VL01371&body\_part=VL01393&subdiscipline=0&topic=0&method=clinical+trial&authors\_association=&title=&source=&year\_of\_publication=&date\_record\_was\_created=&nscore=&perpage=20&lop=and&find=&find=Start+Search

### Screen shot of search page

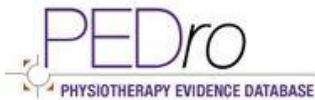

PEDro, the Physiotherapy Evidence Database, is a free database of randomised trials, systematic reviews and clinical practice guidelines in physiotherapy. You can search the database for bibliographic details, and sometimes full text, of trials, reviews and guidelines using this Advanced Search page or the [Simple Search page](#). PEDro is produced by the Centre for Evidence-Based Physiotherapy at The George Institute for Global Health. For more information please visit the [PEDro home-page](#).

[Home](#) [New Search \(Simple\)](#) [New Search \(Advanced\)](#) [Search Help](#)

|                                             |                                                                                                                   |
|---------------------------------------------|-------------------------------------------------------------------------------------------------------------------|
| Abstract & Title:                           | <input type="text" value="carpal tunnel syndrome"/>                                                               |
| Therapy:                                    | <input type="text" value="acupuncture"/>                                                                          |
| Problem:                                    | <input type="text" value="pain"/>                                                                                 |
| Body Part:                                  | <input type="text" value="hand or wrist"/>                                                                        |
| Subdiscipline:                              | <input type="text"/>                                                                                              |
| Topic:                                      | <input type="text"/>                                                                                              |
| Method:                                     | <input type="text" value="clinical trial"/>                                                                       |
| Author/Association:                         | <input type="text"/>                                                                                              |
| Title Only:                                 | <input type="text"/>                                                                                              |
| Source:                                     | <input type="text"/>                                                                                              |
| Published Since:                            | <input type="text"/> [YYYY]                                                                                       |
| New records added since:                    | <input type="text"/> [DDMMYYYY]                                                                                   |
| Score of at least:                          | <input type="text"/> [10]                                                                                         |
| Return:                                     | <input type="text" value="20"/> records at a time                                                                 |
| When Searching:                             | <input checked="" type="radio"/> Match all search terms (AND)<br><input type="radio"/> Match any search term (OR) |
| <input type="button" value="Start Search"/> |                                                                                                                   |

## Appendix 2: Categories available in fields with drop-down menus in the PEDro advanced search

---

### Subdiscipline

#### Cardiothoracics

*Includes, but is not restricted to, papers evaluating acute and rehabilitation cardiothoracic interventions or fitness training on those with conditions affecting the cardiothoracic system. This subdiscipline does not include studies of general fitness training among patient populations. Studies of general fitness training for healthy populations are not indexed on PEDro.*

#### Continence and women's health

*Includes, but is not restricted to male and female incontinence and pre- and post-natal interventions for the mother.*

#### Ergonomics and occupational health

*Includes, but is not restricted to, interventions based at workplaces or on workers for work-related conditions.*

#### Gerontology

*Includes papers where the average age of the study sample is over 60, and papers on conditions which commonly affect older people (eg, arthritis).*

#### Musculoskeletal

*Includes, but is not restricted to, low back pain, rheumatoid disease, entrapment syndromes, neuralgia.*

#### Neurology

*Includes, but is not restricted to, lesions of the central and peripheral nervous systems excluding those whose primary presentation is pain or paraesthesia such as carpal tunnel syndrome, neuralgia or sciatica.*

#### Oncology

*Includes papers evaluating interventions for health problems due to tumours or cancers.*

#### Orthopaedics

*Includes only fractures and intervention before or after orthopaedic surgery (eg, knee replacements, ligament repairs).*

#### Paediatrics

*Includes papers where the average age of the study sample is under 16, and papers on conditions which commonly affect children (eg, cystic fibrosis).*

#### Sports

*Includes papers which specifically mention sports injuries as well as conditions which commonly affect sports people (eg, ligament repairs).*

[no appropriate value in this field]

---

### Problem

Difficulty with sputum clearance

Frailty  
Impaired ventilation  
Incontinence  
Motor incoordination  
Muscle shortening, reduced joint compliance  
Muscle weakness  
Oedema  
Pain  
Reduced exercise tolerance  
Reduced work tolerance  
Skin lesion, wound, burn  
[no appropriate value in this field]

---

**Therapy**

Acupuncture  
Behaviour modification  
Education  
Electrotherapies, heat, cold  
Fitness training  
Health promotion  
Hydrotherapy, balneotherapy  
Neurodevelopmental therapy, neurofacilitation  
Orthoses, taping, splinting  
Respiratory therapy  
Skill training  
Strength training  
Stretching, mobilisation, manipulation, massage  
[no appropriate value in this field]

---

**Body Part**

Head or neck  
Upper arm, shoulder or shoulder girdle  
Forearm or elbow  
Hand or wrist  
Chest  
Thoracic spine  
Lumbar spine, sacro-iliac joint or pelvis

Perineum or genito-urinary system

Thigh or hip

Lower leg or knee

Foot or ankle

[no appropriate value in this field]

---

**Topic**

Chronic pain

*Includes papers evaluating management of chronic pain including chronic pain of musculoskeletal or neurological origin.*

Chronic respiratory disease

*Includes papers evaluating management of chronic respiratory disease including interstitial lung disease, bronchiectasis and chronic obstructive pulmonary disease.*

Neurotrauma

*Includes papers evaluating management of spinal cord injury or traumatic brain injury.*

Whiplash

*Includes papers evaluating management of whiplash associated disorders.*

[no appropriate value in this field]

---

Lists and definitions supplied with permission from PEDro

---
